# Supplementary figures and images for: Effect of kuratsuki Bacillus and Priestia on Taste of Sake
Source: MDPI journal article supplement (doi:10.3390/applmicrobiol4010011), 2024-01-15

Astringency

A-10

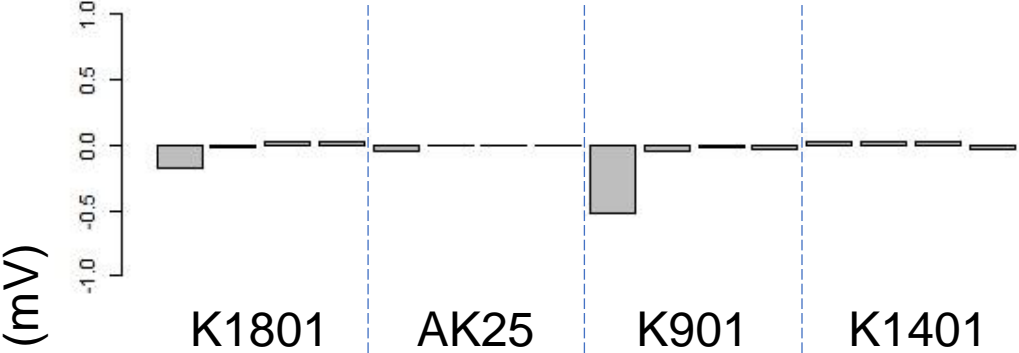

B-12

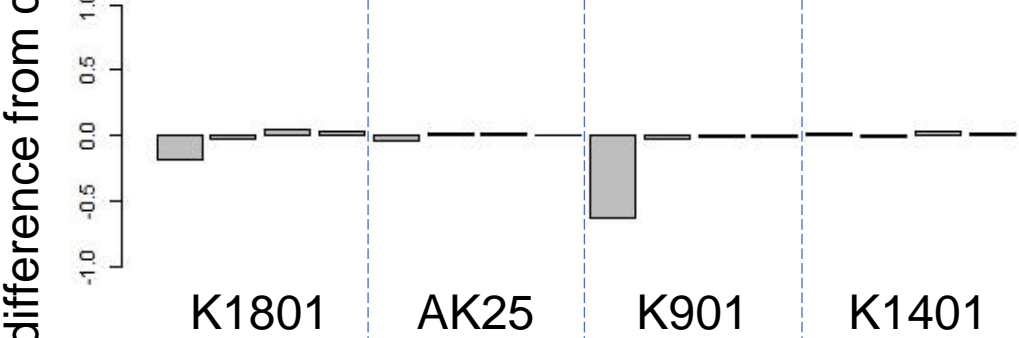

A-10+B-12

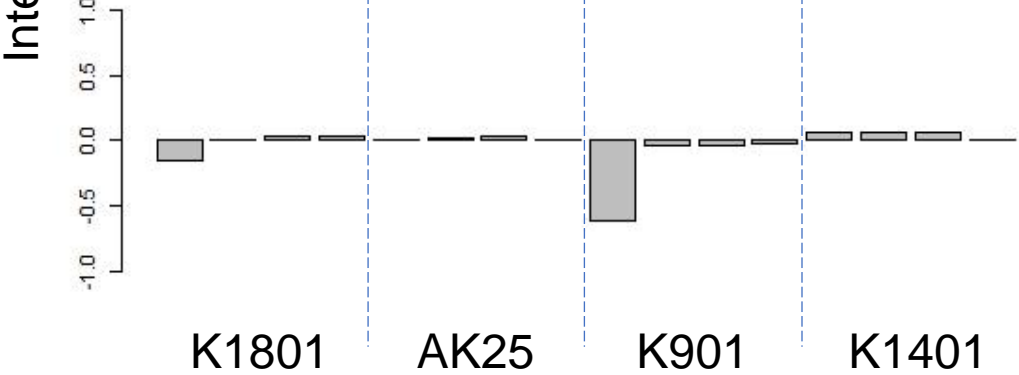

Fig. S1

Bitter

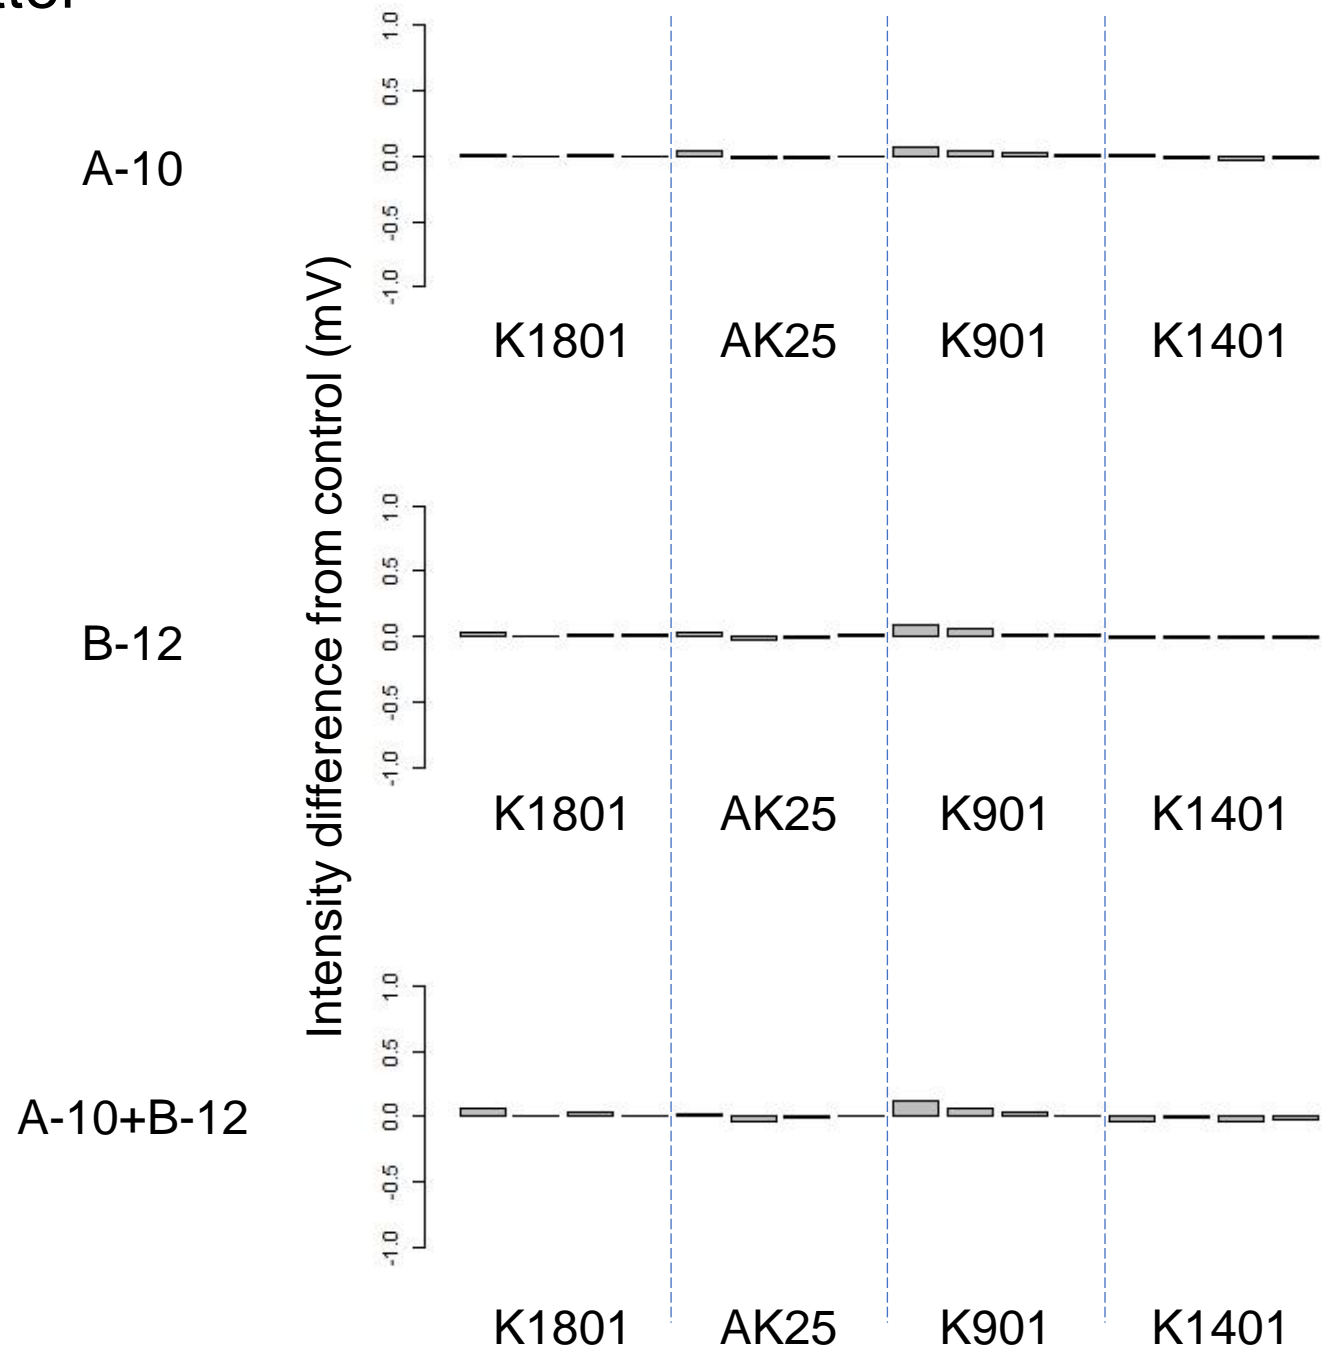

Fig. S2

Supplement: s1 [file s1]
